# Supplementary material for: Polarization effects on the interfacial conductivity in LaAlO3/SrTiO3heterostructures: a first-principles study
Source: Royal Society of Chemistry journal article supplement (doi:10.1039/c5cp07581e), 2016-01-01
Supplement: c5cp07581e1.pdf [file c5cp07581e1.pdf]

## **Polarization Effects on the Interfacial Conductivity in the LaAlO<sub>3</sub>/SrTiO<sub>3</sub> Heterostructure: First-Principles Study**

Maziar Behtash, Safdar Nazir, Yaqin Wang, and Kesong Yang\*

*Department of NanoEngineering, University of California, San Diego, 9500 Gilman  
Drive, Mail Code 0448, La Jolla, CA 92093-0448, USA*

\*E-mail: [kesong@ucsd.edu](mailto:kesong@ucsd.edu), Tel: +1-858-534-2514

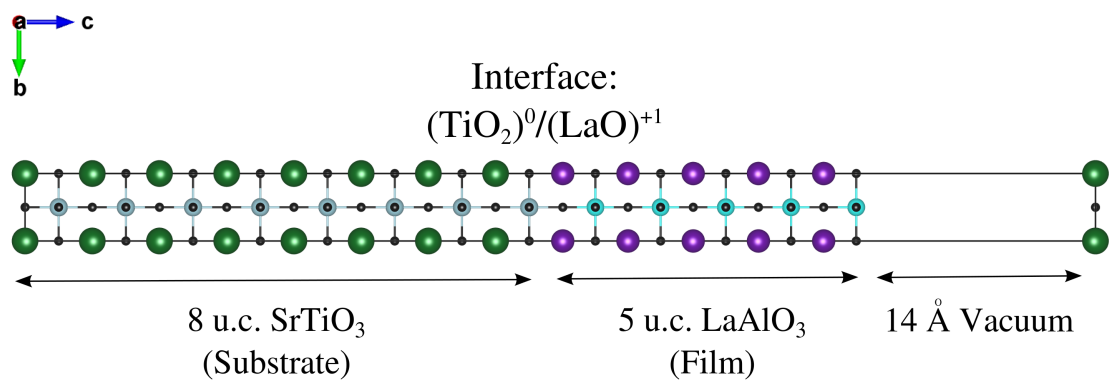

**Figure S1:** Structural model of the  $\text{LaAlO}_3/\text{SrTiO}_3$  (LAO/STO) heterostructure (HS)-based slab system.

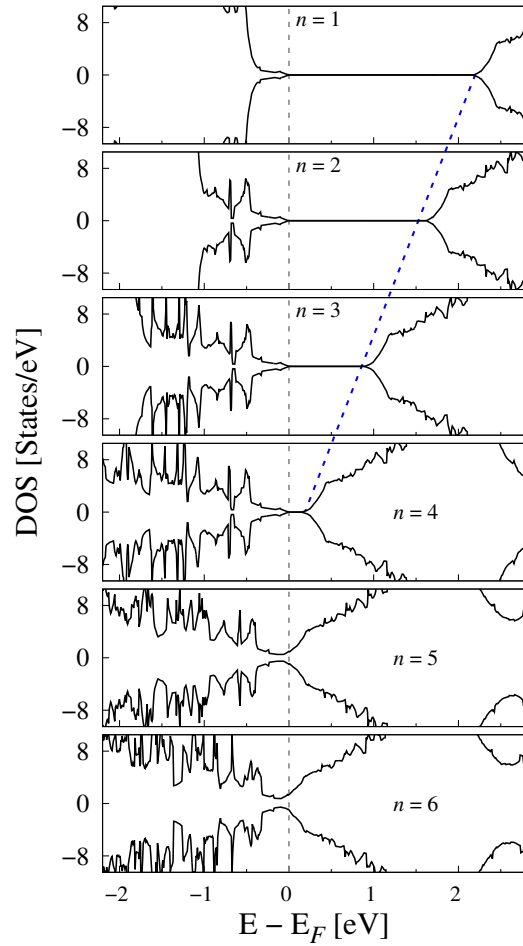

**Figure S2:** Calculated total DOS of the unstrained  $(\text{LAO})_n/\text{STO}$  ( $n=1-6$ ) HS-based slab systems. The vertical black dashed line indicates the Fermi level at 0 eV. The dashed blue line is plotted as a guide of eye.

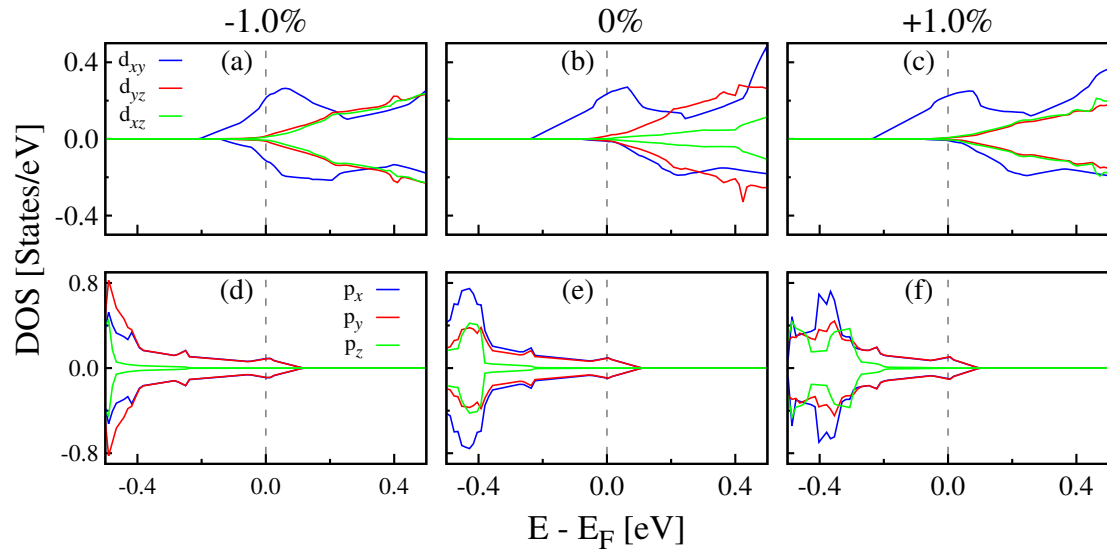

**Figure S3:** Calculated layer-resolved DOS of the Ti 3d orbitals from interfacial (IF-I) TiO<sub>2</sub> layers in the STO substrate and O 2p orbitals from AlO<sub>2</sub> surface layers for -1%, 0%, and +1% uniaxially strained (LAO)<sub>5</sub>/STO HS-based slab systems.

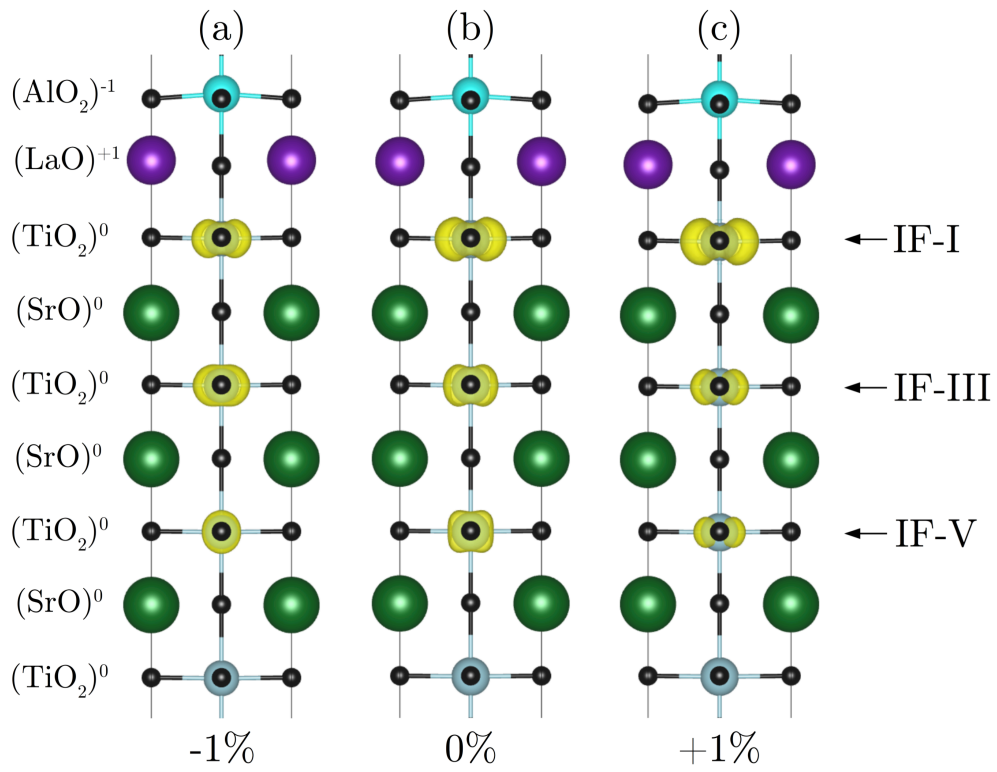

**Figure S4:** Calculated charge density projected on the bands forming the 2DEG in the  $(\text{LAO})_5/\text{STO}$  HS-based slab systems with  $-1\%$  (a),  $0\%$  (b), and  $+1\%$  (c) uniaxial strains.
